# Supplementary material for: Georesources as an Alternative for Sustainable Development in COVID-19 Times—A Study Case in Ecuador
Source: MDPI journal article supplement (doi:10.3390/su14137856), 2022-06-28
Supplement: s1 [file s1]

## SUPPLEMENTARY MATERIALS

Article

### Georesources as an Alternative for Sustainable Development in COVID-19 Times. A Study Case in Ecuador

Supplementary Materials:

**Table S1:** Evaluation criteria for each type of value (S, UEP, PTU and DR) del método Brilha, with their respective scores and weight. **Source:** Adapted from [122].

| Value                                  | Score range | Weight (%) |
|----------------------------------------|-------------|------------|
| <b>Scientific (S)</b>                  |             |            |
| A: Representativeness                  |             | 30.00      |
| B: Key locality                        |             | 20.00      |
| C: Scientific knowledge                |             | 5.00       |
| D: Integrity                           | 1-4         | 15.00      |
| E: Geological diversity                |             | 5.00       |
| F: Rarity                              |             | 15.00      |
| G: Use limitations                     |             | 10.00      |
| <b>Educational Potential Use (EPU)</b> |             |            |
| A: Vulnerability                       |             | 10.00      |
| B: Accessibility                       |             | 10.00      |
| C: Safety                              |             | 10.00      |
| D: Logistics                           | 1-4         | 5.00       |
| E: Density of population               |             | 5.00       |
| F: Association with other values       |             | 5.00       |
| G: Scenery                             |             | 5.00       |

|                                                                      |     |       |
|----------------------------------------------------------------------|-----|-------|
| H: Uniqueness                                                        |     | 5.00  |
| I: Observation conditions                                            |     | 10.00 |
| J: Didactic potential                                                |     | 20.00 |
| K: Interpretative potential                                          |     | 0.00  |
| L: Economic level                                                    |     | 0.00  |
| <b>Potential Tourism Use (PTU)</b>                                   |     |       |
| A: Vulnerability                                                     |     | 10.00 |
| B: Accessibility                                                     |     | 10.00 |
| C: Safety                                                            |     | 10.00 |
| D: Logistics                                                         |     | 5.00  |
| E: Density of population                                             |     | 5.00  |
| F: Association with other values                                     |     | 5.00  |
| G: Scenery                                                           | 1–4 | 15.00 |
| H: Uniqueness                                                        |     | 10.00 |
| I: Observation conditions                                            |     | 5.00  |
| J: Didactic potential                                                |     | 0.00  |
| K: Interpretative potential                                          |     | 10.00 |
| L: Economic level                                                    |     | 5.00  |
| M: The proximity of recreational areas                               |     | 5.00  |
| <b>Degradation Risk (DR)</b>                                         |     |       |
| A: Deterioration of geological elements                              |     | 35.00 |
| B: Proximity to areas/activities with potential to cause degradation |     | 20.00 |
| C: Legal protection                                                  | 1–4 | 20.00 |
| D: Accessibility                                                     |     | 15.00 |
| E: Density of population                                             |     | 10.00 |

| Total | 100.00 |
|-------|--------|
|-------|--------|

**Note:** S, UEP and PTU classification, high (400–301), moderate (300–201), low (200–101) and very low (100).

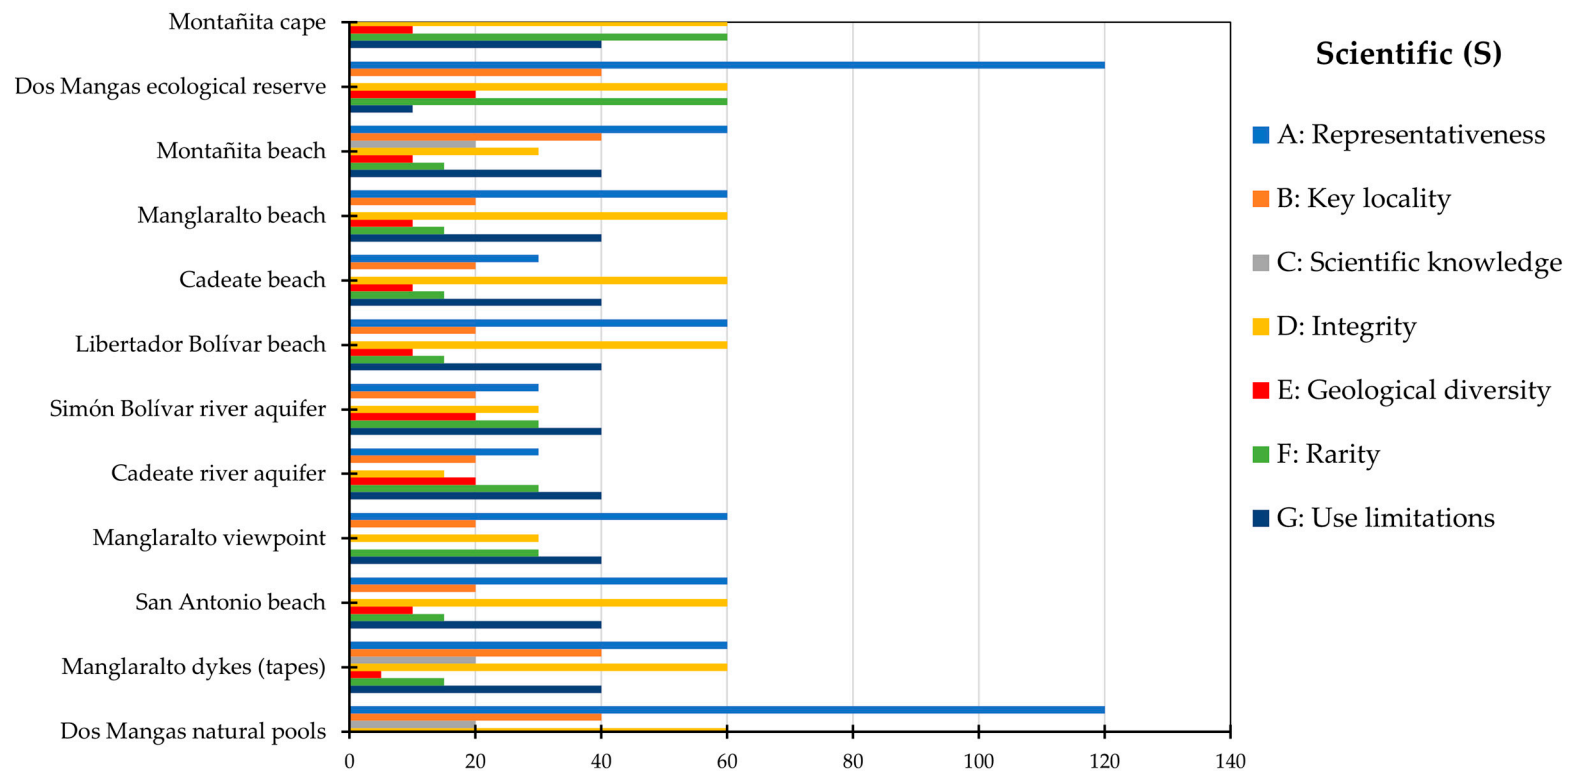

**Figure S1.** Distribution of scientific values of potential geosites and SGI.

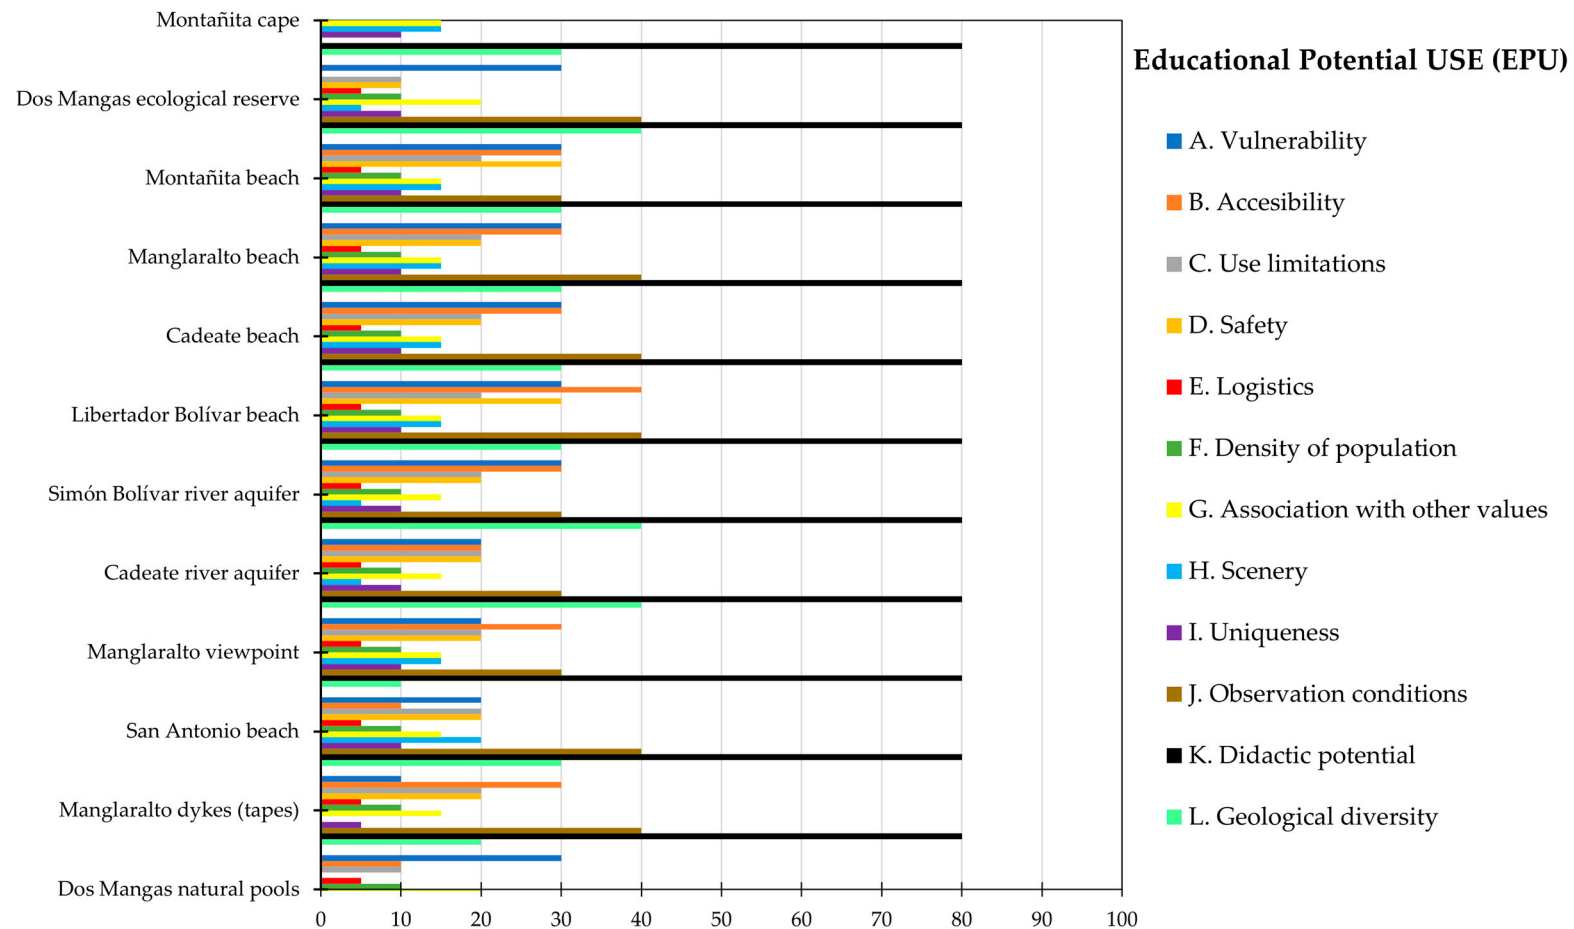

**Figure S2.** Distribution of potential educational use values of potential geosites and SGI.

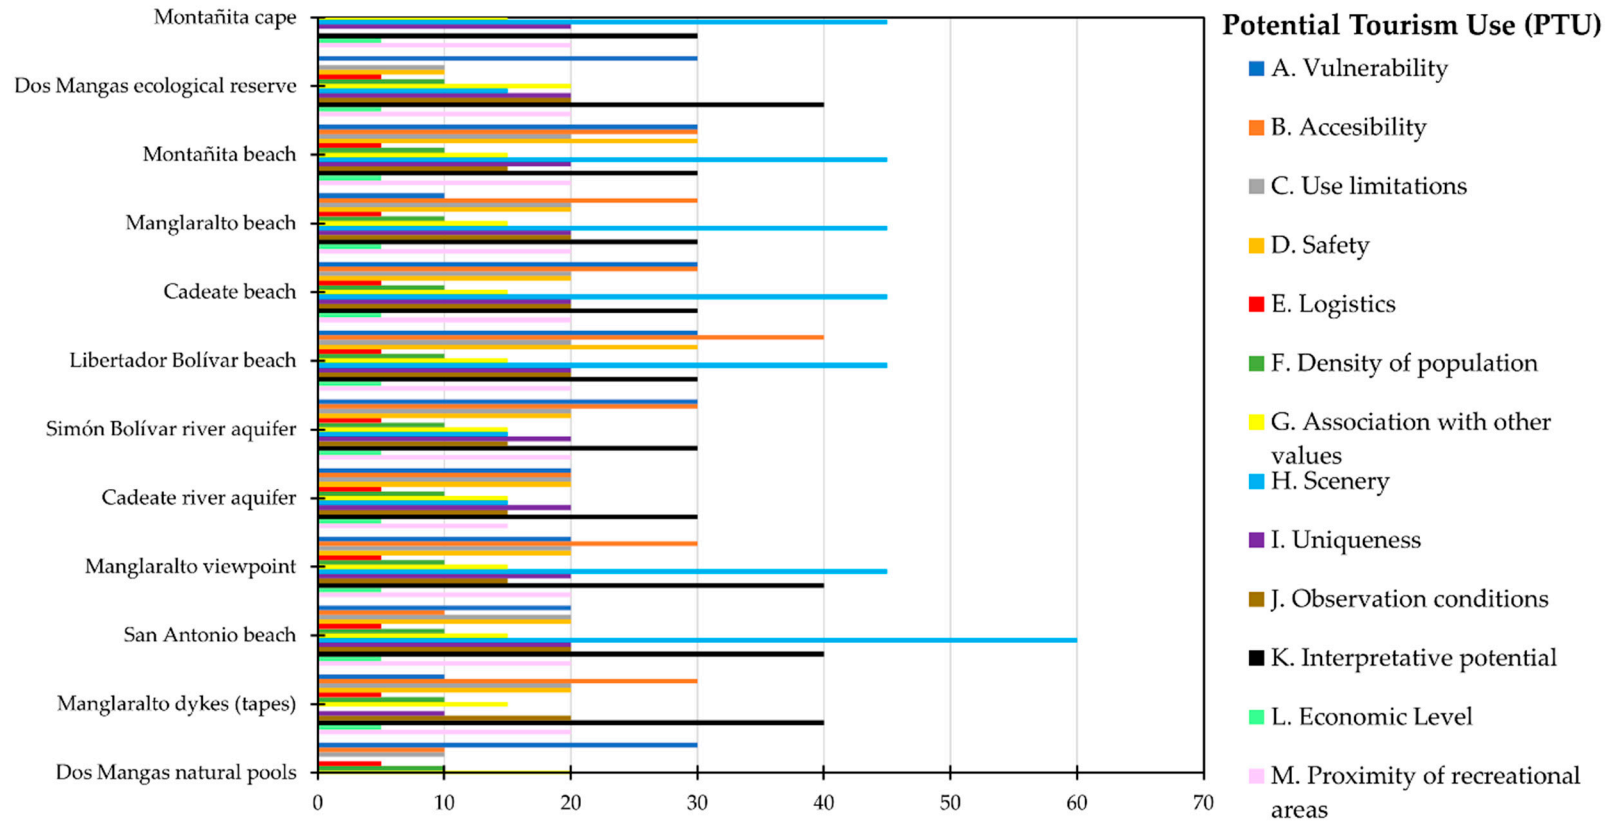

**Figure S3.** Distribution of potential touristic use values of potential geosites and SGI.

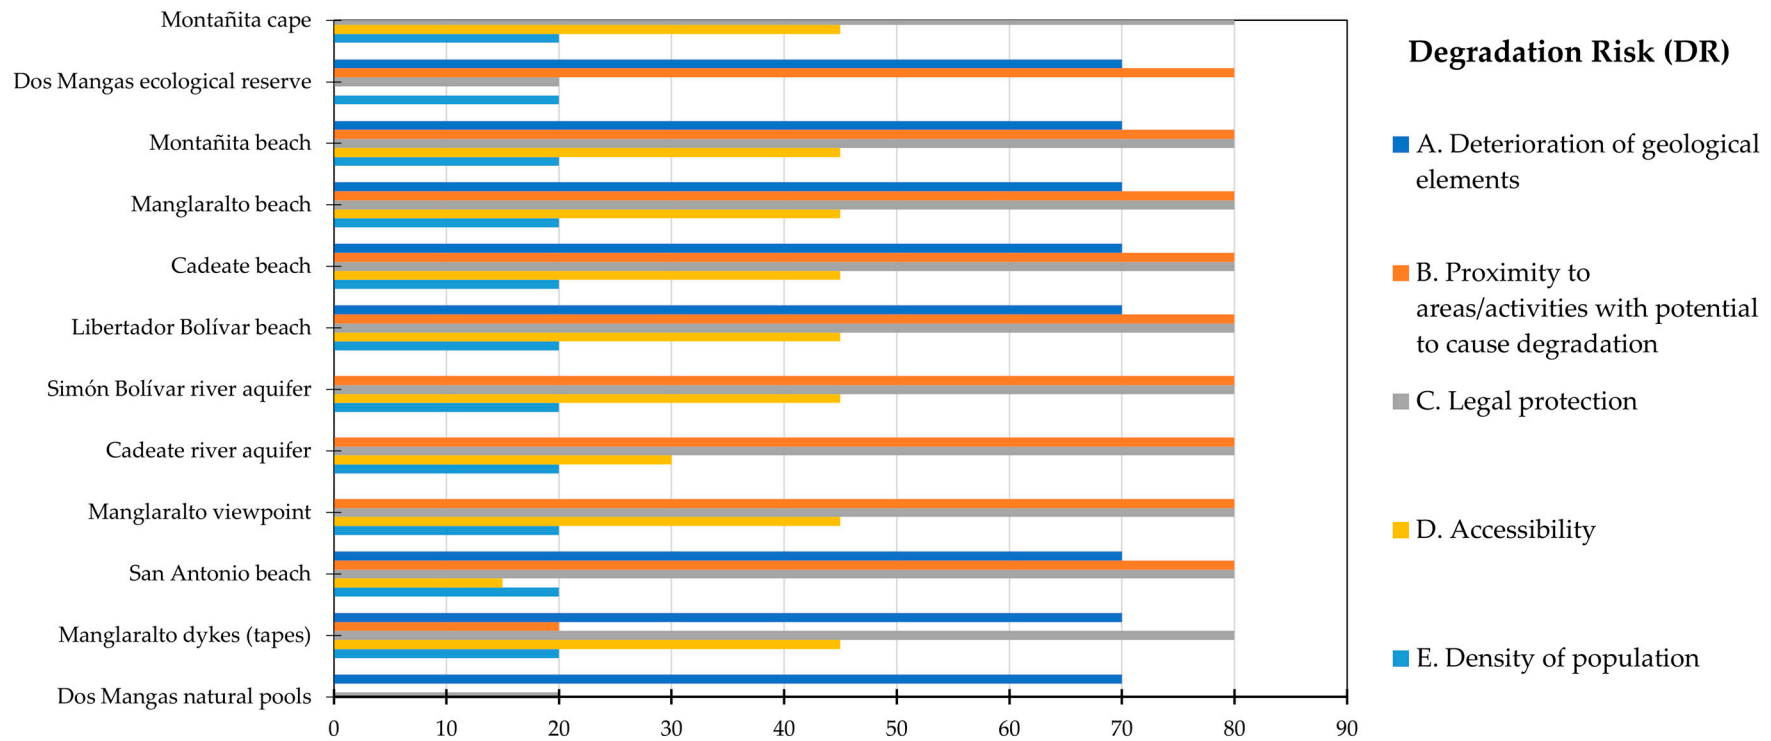

**Figure S4.** Distribution of degradation risk values of potential geosites and SGI.

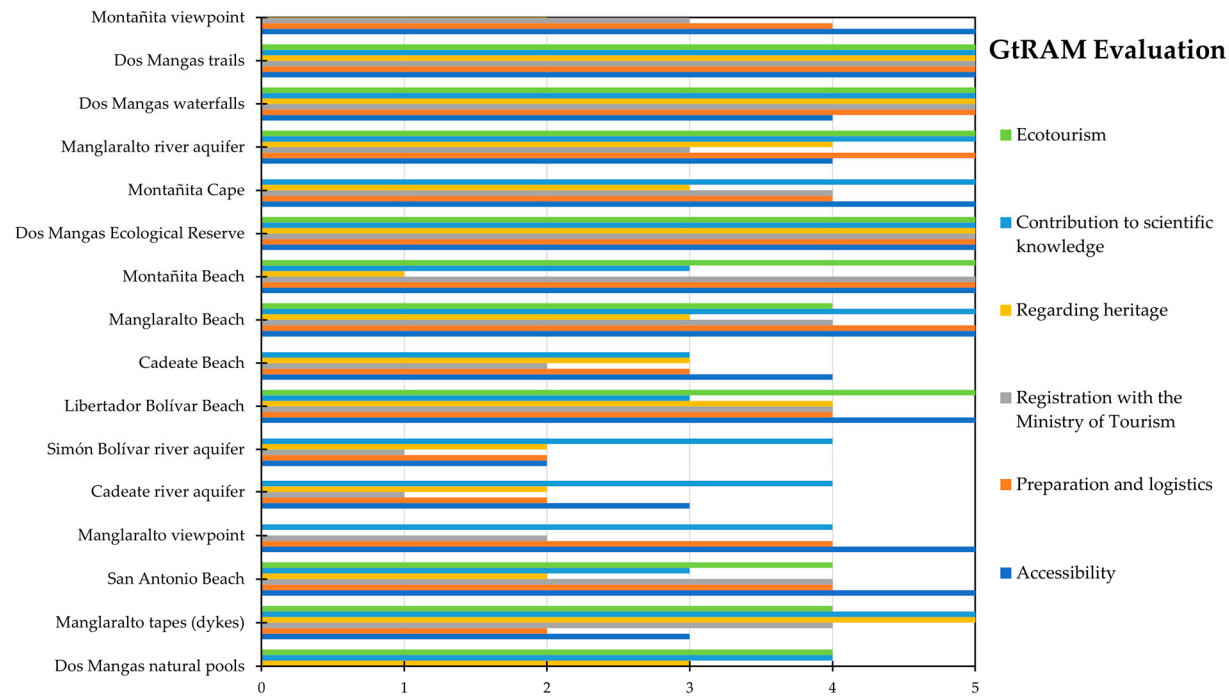

**Figure S5.** Evaluation of geosites and through GtRAM method.
