# Supplementary material for: Georesources as an Alternative for Sustainable Development in COVID-19 Times—A Study Case in Ecuador
Source: MDPI journal article supplement (doi:10.3390/su14137856), 2022-06-28
Supplement: s1 [file s1]

Archive with 1 entries (1 files):
- sustainability-1752935-supplementary.pdf
